# Supplementary material for: A catalytic and mechanistic investigation of a PCP pincer palladium complex in the Stille reaction
Source: Royal Society of Chemistry journal article supplement (doi:10.1039/b417908k), 2005-01-01
Supplement: b417908k.pdf [file b417908k.pdf]

Electronic Supplementary Information for:

## A catalytic and mechanistic investigation of a PCP pincer palladium complex in the Stille reaction

Daniel Olsson, Patrik Nilsson, Mostafa El Masnaouy and Ola F. Wendt\*

*Inorganic Chemistry, Department of Chemistry, Lund University,*

*P. O. Box 124, S-221 00 Lund, Sweden. E-mail: ola.wendt@inorg.lu.se*

*Received XXXX XX, 2004*

**ESI Table 1.** Reaction conditions and observed pseudo-first-order rate constants for Reaction (1) at 160 °C in benzene-*d*<sub>6</sub> solvent when Me<sub>3</sub>SnPh was used in excess and varied. Both constant for the reactant decay and product formation are displayed.<sup>a</sup>

| 10 <sup>3</sup> /M |                        | 10 <sup>5</sup> k <sub>1</sub> /s <sup>-1</sup> |                 |
|--------------------|------------------------|-------------------------------------------------|-----------------|
| [2]                | [Me <sub>3</sub> SnPh] | 4-bromoanisole                                  | 4-phenylanisole |
| 0.16               | 108                    | 16.4±1.2                                        | 20.0±2.2        |
| 0.16               | 216                    | 17.8±1.3                                        | 35±4            |
| 0.16               | 216                    | 20±6                                            | 7.1±1.2         |
| 0.16               | 432                    | 15.2±2.4                                        | 14.±1.9         |
| 0.16               | 432                    | 18±3                                            | 8.6±1.3         |
| 0.16               | 648                    | 3.6±1.0                                         | 4.9±0.9         |
| 0.16               | 648                    | 1.94±0.37                                       | 2.1±0.4         |
| 0.15               | 648                    | 55±7                                            | 25±4            |
| 0.17               | 864                    | 36.6±2.5                                        | 31±10           |
| 0.10               | 864                    | 52±12                                           | 41±7            |
| 0.15               | 864                    | 39±6                                            | 37±10           |
| 0.30               | 864                    | 82±15                                           | 24±6            |
| 0.52               | 864                    | 120±12                                          | 93±14           |

<sup>a</sup>[Ferrocene]=3.66 mM and [4-bromoanisole]=9.62 mM in all measurements.

**ESI Table 2.** Results of the Stille reaction mediated by catalyst precursor **2** under various reaction conditions.

| Entry | ArX <sup>a†</sup>                     | [Pd] <sup>b</sup> (%) | T/°C | TON <sup>d</sup> | TOF <sup>e</sup> /h <sup>-1</sup> | Yield <sup>f,§</sup> (%) |
|-------|---------------------------------------|-----------------------|------|------------------|-----------------------------------|--------------------------|
| 1     | PhCl                                  | 0.01                  | 110  | -                | -                                 | -                        |
| 2     | PhCl                                  | 0.01                  | 160  | 590              | 33                                | 6                        |
| 3     | PhCl                                  | 0.0001                | 160  | -                | -                                 | Trace                    |
| 4     | PhBr                                  | 0.0001                | 110  | -                | -                                 | Trace                    |
| 5     | PhI                                   | 0.01                  | 110  | 1300             | 74                                | 13                       |
| 6     | PhI                                   | 0.01                  | 160  | 8100             | 450                               | 81                       |
| 7     | PhI                                   | 0.0001                | 110  | -                | -                                 | Trace                    |
| 8     | 4-BrC <sub>6</sub> H <sub>4</sub> CHO | 0.01                  | 110  | 700              | 39                                | 7                        |
| 9     | 4-BrC <sub>6</sub> H <sub>4</sub> CHO | 0.0001                | 160  | -                | -                                 | -                        |
| 10    | 4-BrC <sub>6</sub> H <sub>4</sub> Me  | 0.01                  | 110  | -                | -                                 | -                        |
| 11    | 4-BrC <sub>6</sub> H <sub>4</sub> Me  | 0.0001                | 110  | -                | -                                 | -                        |
| 12    | 4-BrC <sub>6</sub> H <sub>4</sub> Me  | 0.0001                | 160  | 320000           | 18000                             | 32                       |
| 13    | 4-BrC <sub>6</sub> H <sub>4</sub> OMe | 0.01                  | 110  | 1300             | 71                                | 13                       |
| 14    | 4-BrC <sub>6</sub> H <sub>4</sub> OMe | 0.0001                | 110  | -                | -                                 | -                        |
| 15    | 4-BrC <sub>6</sub> H <sub>4</sub> OMe | 0.0001                | 160  | 210000           | 11000                             | 21                       |
| 16    | 2-BrC <sub>6</sub> H <sub>4</sub> OMe | 0.01                  | 110  | 1200             | 68                                | 12                       |
| 17    | 2-BrC <sub>6</sub> H <sub>4</sub> OMe | 0.0001                | 110  | -                | -                                 | -                        |
| 18    | 2-BrC <sub>6</sub> H <sub>4</sub> OMe | 0.0001                | 160  | 270000           | 15000                             | 27                       |

<sup>a</sup>1.0×10<sup>-3</sup> mol. <sup>b</sup>[Pd]/ArX × 100. <sup>c</sup>Refers to the time after which no improvement of the yield was detected. <sup>d</sup>mol product/mol catalyst, based on GC yield. <sup>e</sup>mol product/(mol catalyst × time), based on GC yield. <sup>f</sup>Yield determined by GC based on the product. <sup>§</sup>No improvement in yield was detected after 18 h reaction time in all entries.

<sup>†</sup> In all the reactions with phenyl chloride as substrate a white precipitate was obtained after a few hours, which turned the reaction mixture to a yellow-brown suspension during the rest of the reaction time; this was never observed in the aryl bromide or the phenyl iodide reactions.

## Crystallography

Slow crystallisation of **1**·THF from THF at room temperature gave yellow, octahedral crystals suitable for single crystal X-ray diffraction. Intensity data was collected at 293 K with a Bruker SMART CCD system using  $\omega$ -scans and a rotating anode with Mo-K $\alpha$  radiation ( $\lambda = 0.71073 \text{ \AA}$ ).<sup>1</sup> The completeness of the data set was 95.9% out to  $\Theta = 31.67^\circ$ . The intensity was corrected for Lorentz, polarisation and absorption effects using SADABS.<sup>2</sup> All reflections were integrated using SAINT.<sup>3</sup> The structure was solved by direct methods and refined by full-matrix least-squares calculations on  $F^2$  using SHELXTL 5.1.<sup>4</sup> Non-H atoms were refined with anisotropic displacement parameters. Hydrogen atoms were constrained to parent sites, using a riding model.

CCDC reference number 256981.

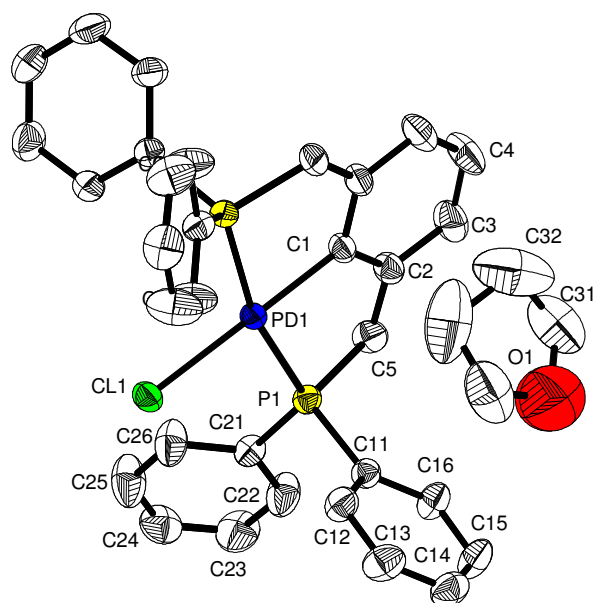

**Figure 1.** A DIAMOND plot with atomic numbering of the molecular structure of complex **1**. The ellipsoids denote 30% probability. Bond distances ( $\text{\AA}$ ) and angles ( $^\circ$ ) with estimated standard deviations: Pd–C1 = 2.038(3); Pd–Cl = 2.4123(8); Pd–P1 = 2.2938 (6); P1–Pd–P1\* = 165.73(3); P1–Pd–C1 = 82.867(16); P1–Pd–Cl = 97.133(16).

## Derivation of rate laws

The two most obvious homogeneous possibilities are a Pd(II)-Pd(IV) cycle, as proposed by Jensen, Milstein and others for the Heck reaction, and a classical Pd(0)-Pd(II) cycle. These two cycles are depicted in Scheme S1 and S2.

If the reaction is described by Scheme S1 this would, with rate limiting transmetallation and steady state conditions assumed for the intermediate (*i*), give a rate law of the following form:

$$\text{Rate} = \frac{k_1 k_2 [\text{Sn}][\text{ArX}][\text{Pd}]}{k_{-1}[\text{ArX}] + k_2[\text{Sn}]}$$

Obviously the first step needs to be reversible and pushed to the left (to explain the lack of reactivity of both substrates in the preliminary investigation). Thus,  $k_{-1} \gg k_2[\text{Sn}]$  and this will simplify the equation to give the observed rate law. Also a reversed order of substrate entry (*i.e.* reversible transmetallation followed by rate determining oxidative addition) would after simplification give the observed rate law. Hence, in principle, a Pd(II)-Pd(IV) cycle is compatible with the observed rate law but it fails to explain the erratic kinetics as well as the COT and mercury test.

A classical cycle (Scheme S2) would also give a rate law of the same form as above if the oxidative addition is reversible and shifted to the left. Earlier investigations of Pd(0)-Pd(II) systems almost always show a zero order dependence on the electrophile, since oxidative addition is irreversible and transmetallation rate determining.

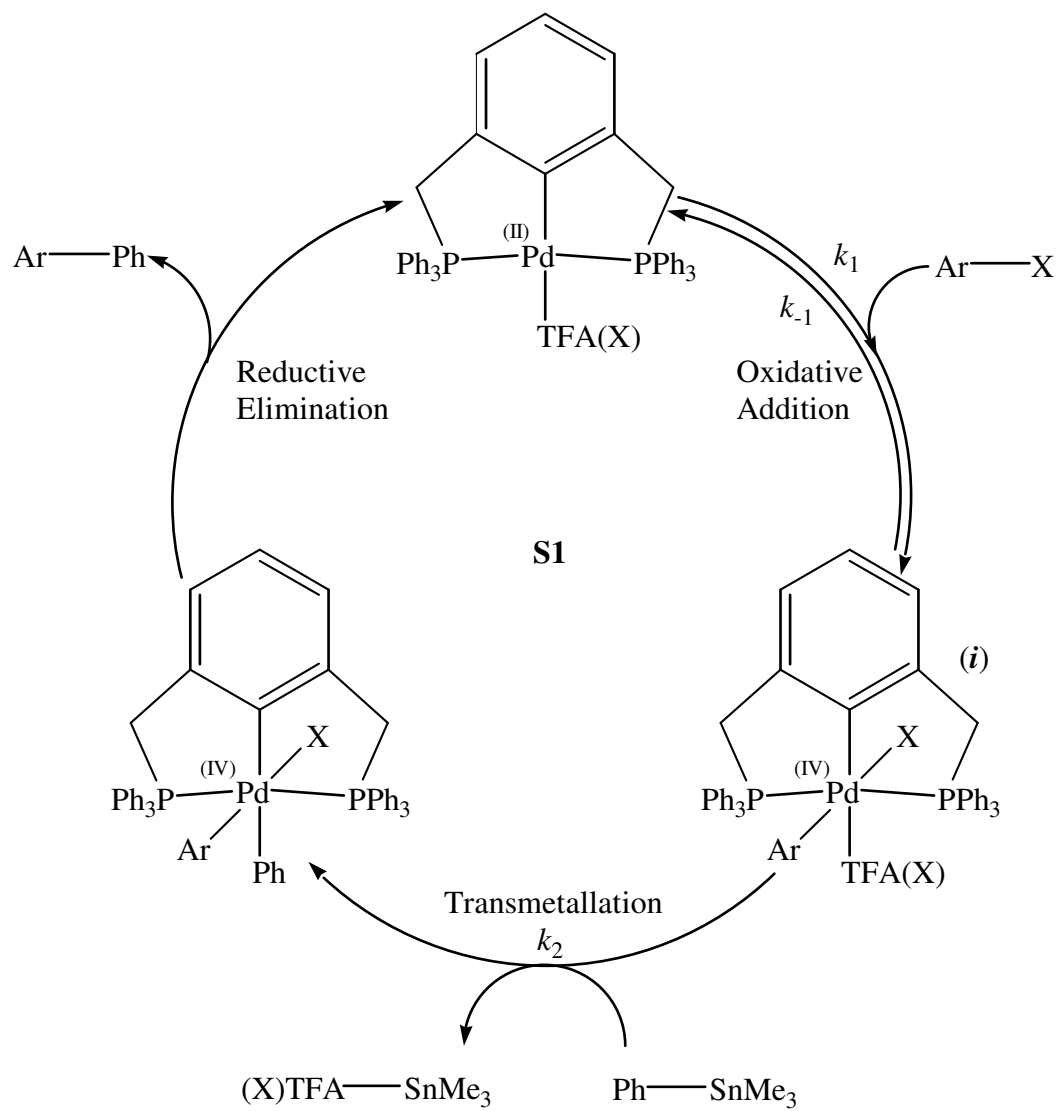

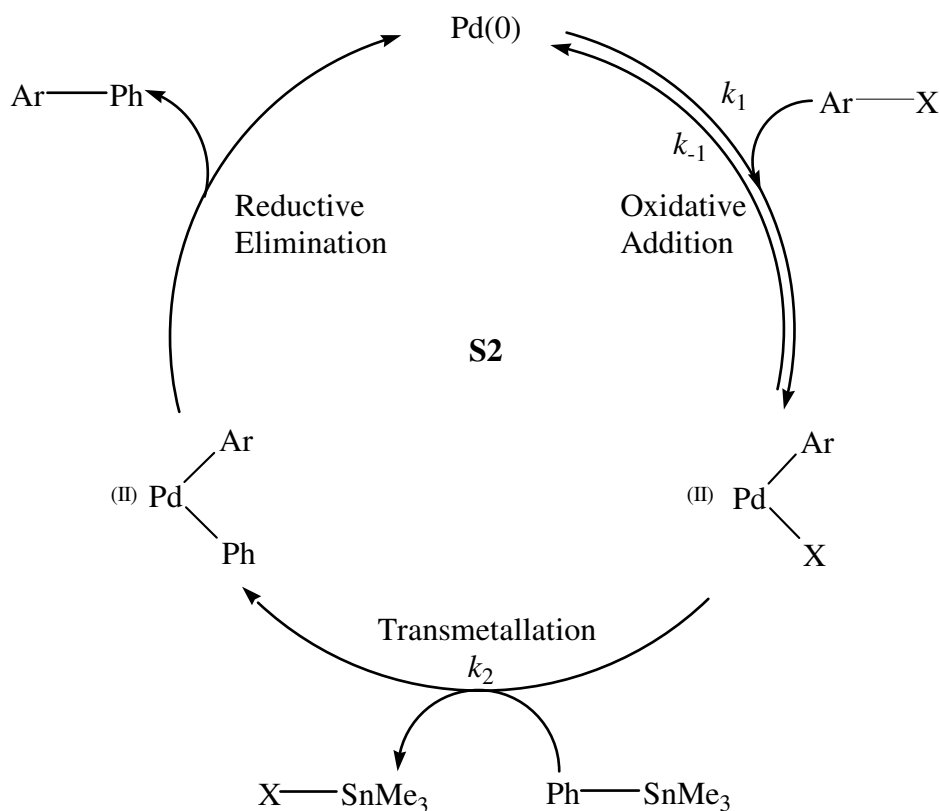

- 1 BrukerAXS, SMART, Area Detector Control Software, Bruker Analytical X-ray System, Madison, Wisconsin, USA, 1995.
- 2 G. M. Sheldrick, SADABS, Program for absorption correction, University of Göttingen, Germany, 1996.
- 3 BrukerAXS, SAINT Integration Software, Bruker Analytical X-ray System, Madison, Wisconsin, USA, 1995.
- 4 G. M. Sheldrick, SHELXTL5.1, Program for Structure solution and least square refinement, University of Göttingen, Germany, 1996.
